# Supplementary material
Source: publisher site journal article supplement (https://www.spandidos-publications.com/8163/downloadSupplementary)
Supplement: Supplementary file 1 [file downloadSupplementary]

Table SI. Baseline clinical characteristics of patients with ischemic and hemorrhagic moyamoya disease.

| Variable       | Ischemic MMD | Hemorrhage MMD | P-value |
|----------------|--------------|----------------|---------|
| Number         | 6            | 6              | -       |
| Male           | 2            | 3              | -       |
| Age (years)    | 32.3±9.9     | 41.2±8.0       | NS      |
| RBC (x10E12/L) | 3.4±0.5      | 4.4±0.5        | NS      |
| WBC (x10E9/L)  | 5.8±0.6      | 4.4±0.5        | NS      |
| PLT            | 214.7±66     | 225.2±60       | NS      |

All ischemic patients were first presented with stroke and all hemorrhagic were first presented with intra-cranial hemorrhage. RBC, red blood count; WBC, white blood count; PLT, platelet count; NS, not significant.
